# Supplementary material for: Consolidated bioprocessing of cellulose to itaconic acid by a co-culture of Trichoderma reesei and Ustilago maydis
Source: Biotechnol Biofuels. 2020 Dec 14;13:207. doi: 10.1186/s13068-020-01835-4 (PMC7737373; doi:10.1186/s13068-020-01835-4)
Supplement: Supplementary file 2 — Additional file 2. Numerical data. [file 13068_2020_1835_MOESM2_ESM.xlsx]

## Sheet: Figure 1
Figure 1 Data		Values from biological duplicates shown in subcolumns
	Time point [h]	T. reesei Sigmacell		T. reesei α-Cellulose		T. reesei Glucose		P. verruculosum Sigmacell		P. verruculosum α-Cellulose		P. verruculosum Glucose
pH values	0	6.5		6.5		6.5		6.5		6.5		6.5
	69	3.71	3.7	3.6	3.6	3.41	3.41	3.91	3.86	4.94	5.2	3.57	3.53
	100.33	3.46	3.45	3.57	3.53	3.49	3.49	3.59	3.59	4.49	4.6	3.58	3.54
	142.75	3.46	3.45	3.7	3.66	3.64	3.6	3.56	3.54	4.67	4.78	3.72	3.67
Itaconic acid [g/L]	0	0.3		0.3		0.3		0.3		0.3		0.3
	69	13.9853	14.1431	16.2886	16.8535	20.3569	20.3588	10.8546	11.5153	4.93521	3.68918	17.6759	16.2821
	100.33	19.1828	19.5533	18.8433	18.8962	sample lost	18.8578	16.156	16.3206	7.88314	6.01743	sample lost	16.7087
	142.75	20.9076	21.2543	15.2155	16.2606	16.6205	17.0804	17.0795	17.5052	5.75828	5.40916	13.5724	15.1518
Itaconic acid yield [g/g Glucose]	At max. IA concentration	0.398635	0.457869	0.351606	0.342471	0.407139	0.407176	0.301257	0.326237	0.206646	0.192891	0.353517	0.325643

## Sheet: Figure 2
Figure 2 Data									*Outliers excluded
									n.d.= not determined
	Time point [h]	CBP (120 g/L α-cellulose)			SSF (120 g/L α-cellulose)				Comment
Itaconic acid [g/L]	238,6667*	14,0375*	14,9001*	13,4021*	23,9266*	27,6722*	19,6958*		Biological triplicates
	163.833	10.7786	10.272	10.5643	17.1	15.408	13.3211
	142.667	9.79413	9.35359	9.55734	14.1577	16.1977
	118.833	7.64264	7.17871	7.50428	12.121	12.9613	13.5101
	93.75	4.96751	4.81	4.72723	8.9908	9.98452	10.08
	70.5	0	0	0	6.0852	6.03768	6.0588
	0	0			0
pH value	238.667	n.d.	n.d.	n.d.	n.d.	n.d.	n.d.		Biological triplicates
	163.833	6.72	6.72	6.72	7	7.02	7.02
	142.667	6.86	6.84	6.84	7	7	7.03
	118.833	6.74	6.76	6.77	7	7	7
	93.75	6.91	6.92	6.89	7	7	6.99
	70.5	6.45	6.5	6.51	6.66	6.67	6.66
	0	7.3			7.3
Bradford protein [mg/L]	238,6667*	1579,11354*	1623,875818*	1616,99273*	1122,66408*	1200,343972*	1179,52616*		Biological triplicates were pooled. Replicate data are technical replicates of the pooled biological triplicates
	163.833	1783.46	1882.01	1836.04	1417.74	1456.33	1441.51
	142.667	1759,18162*	1841.2	1907.78	1438.64	1447.13	1579.39
	118.833	2148.03	2135.38	2133.31	1536.35	1682.1	1666.05
	93.75	2321.28	1864,3759*	2265.07	1704.81	1802.43	1650.09
	70.5	2244.22	2627,875733*	2286.49	1736.7	1695.12	1840.72
	0	2252.32	2228.32	2505.52	2252.32	2228.32	2505.52
Cellulase activity [FPU/mL]	238,6667*	2.86208	2.73474		2.12704	2.05408			Biological triplicates were pooled. Replicate data are technical replicates of the pooled biological triplicates
	163.833	3.31314	3.58319		2.62041	2.54621
	142.667	3.19196	3.29733		2.84581	2.46629
	118.833	3.89818	3.85319		3.11872	3.11872
	93.75	3.98883	4.19936		2.91339	3.253
	70.5	4.00008	4.20595		3.11906	3.52271
	0	4.23152			4.23152
Cellulose [g/L]	238,6667*	16,10169*			51,02835*				Biological triplicates were pooled and a single value was measured
	163.833	36.4366			54.6083
	142.667	39.4366			sample lost
	118.833	45.5517			70.3483
	93.75	51.265			74.9684
	70.5	58.998			83.7775
	0	115.238			115.238
Fungal biomass [g/L]	238,6667*	7,134281*			7,531098*				Biological triplicates were pooled and a single value was measured
	163.833	9.38708			6.25129
	142.667	9.69111			sample lost
	118.833	10.691			7.68654
	93.75	10.3453			8.88649
	70.5	11.1378			10.1489
	0	4.30134			0.120496
Itaconic acid yield [g/g Glucose]		0.136782	0.130353	0.134062	0.426725	0.384501	0.332424		For yield determination, the itaconic acid concentration of each biological replicate was divided by the same cellulose consumption expressed as glucose equivalents as determined from the pooled triplicates

## Sheet: Figure 4
Figure 4 Data
											n.d.= not determined
	Time point [h]	3 days delay			4 days delay			5 days delay			Time point [h]	0 days delay			Comment
Itaconic acid [g/L]	0	0			0			0			0	0			Single samples
	69	0			n.d.			n.d.			164	0
	90	n.d.			0			n.d.
	115	0.207079			0.139905			0
	234	3.9912			7.09744			6.30862
	400	17.729			21.6357			19.8266
	496	27.3426			29.1327			25.0015
	593	33.8033			33.3489			28.2395
pH value	0	7.367			7.367			7.367			0	7.367			Single samples
	69	7.222			7.222			7.222			164	7.82
	90	n.d.			6.766			6.766
	115	n.d.			n.d.			6.725
	234	6.225			6.183			6.217
	400	6.129			6.103			6.079
	496	5.88			5.831			5.912
	593	5.771			5.648			5.727
Bradford protein [mg/L]	0	97.75	92.2	86.65	97.75	92.2	86.65	97.75	92.2	86.65	0	97.75	92.2	86.65	Technical triplicates of single samples
	69	451.807	447.876	442.822	451.807	447.876	442.822	451.807	447.876	442.822	164	90.8231	79.582	80.8168
	90				1493.88	1520.56	1465.33	1493.88	1520.56	1465.33
	115	1443.32	1457.07	1503.76	1833.99	1969.4	1864.23	1621.83	1732.01	1632.11
	234	1921.36	1986.14	2004.93	2331.52	2175.09	2281.33	2025.51	2048.24	2095.3
	400	2023.52	2161.38	2082.82	2404.29	2433.92	2379.48	2130.56	2358.5	2366.88
	496	1767.66	1976.68	1916.29	2154.95	2367.17	2426.73	2098.24	2324.86	2242.83
	593	1996.58	1878.39	1928.41	2156.92	2096.87	2060.88	2073.96	2255.77	2139.43
Cellulase activity [FPU/mL]	0	0			0			0			0	0			Each sample was measured at two different dilutions to release close to 1,333 g/L glucose during filter paper assay. Each dilution was measured in technical triplicates. The necessary dilution to release exacly 1,333 g/L glucose was determined by regression analysis between the two dilutions. Standard deviation of the regression: + error (blue); - error (green)
	69	0.468369	0.0405447	0.00786595	0.468369	0.0405447	0.00786595	0.468369	0.0405447	0.00786595	164	n.d.
	90	n.d.			2.34233	0.0947442	0.0392857	2.34233	0.0947442	0.0392857
	115	n.d.			n.d.			3.1049	0.329954	0.183507
	234	3.53165	0.0842978	0.0717055	5.69919	1.05499	0.459287	3.92363	1.62246	0.393491
	400	3.99454	0.760344	0.310559	4.66366	0.91203	0.364307	3.85133	0.742362	0.316728
	496	3.28323	1.7099	0.361163	4.25926	0.284501	0.189209	3.49939	0.143377	0.112483
	593	1.70379	0.0156055	0.115553	2.03498	0.162594	0.229473	2.19589	0.114449	0.142146
(NH4)2SO4 [g/L]	0	7533.5	6541.5	7427.5	7533.5	6541.5	7427.5	7533.5	6541.5	7427.5	0	7533.5	6541.5	7427.5	Technical triplicates of single samples
	69	3890.25	3811.86	4749.26	3890.25	3811.86	4749.26	3890.25	3811.86	4749.26	164	5249.9	6105.55	6034.01
	90	n.d.	n.d.	n.d.	1990.33	1636.15	2237.89	1990.33	1636.15	2237.89
	115	1176.51	1161.51	1400.98	961.088	1032.66	1158.27	1659.99	1870.61	1913.31
	234	148.558	97.7312	162.42	143.008	113.965	142.655	100.5	83.414	109.174
	400	89.8311	114.537	127.088	90.7567	73.3346	89.6425	92.8811	104.293	100.423
	496	118.924	102.672	112.775	103.825	104.486	87.1999	73.521	74.939	78.975
	593	121.484	115.224	111.935	114.903	109.916	111.059	113.169	100.266	107.67
KH2PO4 [g/L]	0	1129	997.9		1129	997.9		1129	997.9		0	1129	997.9		Technical duplicates of single samples
	69	583.596	563.846		583.596	563.846		583.596	563.846		164	291.503	279.24
	90	n.d.	n.d.		366.538	362.877		366.538	362.877
	115	242.807	242.621		278.463	273.517		283.427	285.384
	234	209.237	207.319		193.679	179.731		183.563	185.579
	400	212.373	210.693		203.595	201.265		195.388	188.739
	496	276.171	305.71		280.317	290.006		263.541	274.995
	593	263.87	318.193		265.648	271.57		242.415	244.531
Cellulose [g/L]	0	30			30			30			0	30			Single samples; Purple values are calculated based on the fed amount of dry cellulose powder and the residual concentration before feeding
	69	17.2083			17.2083			17.2083			164	n.d.
	90	n.d.			7.0976			7.0976
	115	n.d.			n.d.			4.84834
	115.1	64.8483			64.8483			64.8483
	234	14.3536			10.8658			13.4656
	234.1	74.3536			70.8658			73.4656
	400	13.514			10.1183			7.80865
	400.1	73.514			70.1183			67.8087
	496	21.0791			19.8346			20.1943
	496.1	81.0791			79.8346			80.1942
	593	39.4354			32.7305			42.7278
Fungal biomass [g/L]	0	0			0			0			0	n.d.			Single samples
	69	5.53028			5.53028			5.53028			164	n.d.
	90	n.d.			6.42295			6.42295
	115	n.d.			n.d.			5.93362
	234	16.4973			15.2641			15.2971
	400	19.4273			18.7564			20.3203
	496	26.1537			23.8094			25.4891
	593	29.7698			28.3433			26.8239
